# Supplementary material for: Decomposition of the electronic activity in competing [5,6] and [6,6] cycloaddition reactions between C60 and cyclopentadiene
Source: Royal Society of Chemistry journal article supplement (doi:10.1039/c8cp07626j), 2019-01-01
Supplement: c8cp07626j1.pdf [file c8cp07626j1.pdf]

**Supporting Information for:**  
**Decomposition of the Electronic Activity in Competing**  
**[5,6] and [6,6] Cycloaddition Reactions Between C<sub>60</sub> and**  
**Cyclopentadiene**

Nery Villegas-Escobar,<sup>a,b</sup> Albert Poater,<sup>c</sup> Miquel Solà,<sup>c</sup> Henry F. Schaefer III<sup>b,\*</sup> and Alejandro  
Toro-Labbé<sup>a,\*</sup>

<sup>a</sup>*Laboratorio de Química Teórica Computacional (QTC), Facultad de Química, Pontificia  
Universidad Católica de Chile, Avenida Vicuña Mackenna 4860, Santiago, Chile.*

<sup>b</sup>*Center for Computational Quantum Chemistry, University of Georgia, Athens, Georgia  
30602 USA.*

<sup>c</sup>*Institut de Química Computacional i Catàlisi (IQCC) and Departament de Química,  
Universitat de Girona, M<sup>a</sup> Aurèlia Capmany 69, 17003 Girona, Catalonia, Spain.*

Email: ccq@uga.edu ; atola@puc.cl

## Cartesian Coordinates

### [5.6] path

TS

|   |              |              |              |
|---|--------------|--------------|--------------|
| C | 1.543990000  | 1.654243000  | 2.278722000  |
| C | 1.438065000  | 2.467130000  | 1.168980000  |
| C | 0.150543000  | 3.089907000  | 0.751798000  |
| C | -1.002871000 | 2.540795000  | 1.412329000  |
| C | -0.887409000 | 1.683804000  | 2.585044000  |
| C | 0.348821000  | 1.258222000  | 3.024109000  |
| C | -2.159947000 | 2.170724000  | 0.710079000  |
| C | -2.159947000 | 2.170724000  | -0.710079000 |
| C | -1.002871000 | 2.540795000  | -1.412329000 |
| C | 0.150543000  | 3.089907000  | -0.751798000 |
| C | -2.805262000 | 1.063324000  | -1.426605000 |
| C | -2.014207000 | 0.775262000  | -2.601310000 |
| C | -0.887409000 | 1.683804000  | -2.585044000 |
| C | 0.348821000  | 1.258222000  | -3.024109000 |
| C | 0.529916000  | -0.107886000 | -3.471678000 |
| C | -0.545515000 | -0.987936000 | -3.480926000 |
| C | -1.847802000 | -0.535237000 | -3.034478000 |
| C | 1.831588000  | -0.558838000 | -3.016417000 |
| C | 2.005820000  | -1.868230000 | -2.592542000 |
| C | 0.881524000  | -2.786657000 | -2.596954000 |
| C | -0.363992000 | -2.355471000 | -3.027495000 |
| C | 2.813802000  | -2.150212000 | -1.419168000 |
| C | 2.184859000  | -3.238320000 | -0.694875000 |
| C | 0.992455000  | -3.630701000 | -1.419615000 |
| C | -0.149791000 | -4.003754000 | -0.724658000 |
| C | -0.149791000 | -4.003754000 | 0.724658000  |
| C | 0.992455000  | -3.630701000 | 1.419615000  |
| C | 2.184859000  | -3.238320000 | 0.694875000  |
| C | 2.813802000  | -2.150212000 | 1.419168000  |
| C | 2.005820000  | -1.868230000 | 2.592542000  |
| C | 0.881524000  | -2.786657000 | 2.596954000  |
| C | -0.363992000 | -2.355471000 | 3.027495000  |
| C | -0.545515000 | -0.987936000 | 3.480926000  |
| C | 0.529916000  | -0.107886000 | 3.471678000  |
| C | 1.831588000  | -0.558838000 | 3.016417000  |
| C | 2.453667000  | 0.528475000  | 2.282458000  |
| C | -2.014207000 | 0.775262000  | 2.601310000  |
| C | -1.847802000 | -0.535237000 | 3.034478000  |
| C | 3.237897000  | 0.258463000  | 1.170002000  |
| C | 3.418004000  | -1.111158000 | 0.725990000  |
| C | -1.453720000 | -3.549098000 | 1.175066000  |
| C | -1.559276000 | -2.746294000 | 2.300473000  |
| C | -2.473543000 | -1.618137000 | 2.305483000  |

|   |              |              |              |
|---|--------------|--------------|--------------|
| C | 3.418004000  | -1.111158000 | -0.725990000 |
| C | -1.559276000 | -2.746294000 | -2.300473000 |
| C | -1.453720000 | -3.549098000 | -1.175066000 |
| C | -2.257684000 | -3.264601000 | 0.000000000  |
| C | -2.473543000 | -1.618137000 | -2.305483000 |
| C | -3.233784000 | -1.338743000 | -1.176177000 |
| C | -3.125791000 | -2.182531000 | 0.000000000  |
| C | 1.543990000  | 1.654243000  | -2.278722000 |
| C | 2.453667000  | 0.528475000  | -2.282458000 |
| C | 3.237897000  | 0.258463000  | -1.170002000 |
| C | -3.401849000 | 0.029531000  | -0.732396000 |
| C | 1.438065000  | 2.467130000  | -1.168980000 |
| C | -3.233784000 | -1.338743000 | 1.176177000  |
| C | -3.401849000 | 0.029531000  | 0.732396000  |
| C | -2.805262000 | 1.063324000  | 1.426605000  |
| C | 2.233722000  | 2.175708000  | 0.000000000  |
| C | 3.121335000  | 1.099979000  | 0.000000000  |
| C | 0.303037000  | 5.149613000  | -1.151109000 |
| C | 0.303037000  | 5.149613000  | 1.151109000  |
| C | -0.955903000 | 5.583538000  | 0.696295000  |
| C | -0.955903000 | 5.583538000  | -0.696295000 |
| C | 1.254491000  | 5.348829000  | 0.000000000  |
| H | 0.616454000  | 5.170093000  | -2.189403000 |
| H | -1.828116000 | 5.733253000  | -1.321782000 |
| H | -1.828116000 | 5.733253000  | 1.321782000  |
| H | 0.616454000  | 5.170093000  | 2.189403000  |
| H | 2.151147000  | 4.729241000  | 0.000000000  |
| H | 1.566375000  | 6.403444000  | 0.000000000  |

## RC

|   |              |              |              |
|---|--------------|--------------|--------------|
| C | 1.547053000  | 1.637316000  | 2.296458000  |
| C | 1.441369000  | 2.446811000  | 1.174537000  |
| C | 0.137224000  | 2.899698000  | 0.725322000  |
| C | -1.003647000 | 2.521914000  | 1.419120000  |
| C | -0.892612000 | 1.675413000  | 2.592068000  |
| C | 0.353732000  | 1.243861000  | 3.022892000  |
| C | -2.196786000 | 2.130532000  | 0.694209000  |
| C | -2.196786000 | 2.130532000  | -0.694209000 |
| C | -1.003647000 | 2.521914000  | -1.419120000 |
| C | 0.137224000  | 2.899698000  | -0.725322000 |
| C | -2.824379000 | 1.040001000  | -1.419145000 |
| C | -2.018508000 | 0.759615000  | -2.593190000 |
| C | -0.892612000 | 1.675413000  | -2.592068000 |
| C | 0.353732000  | 1.243861000  | -3.022892000 |
| C | 0.532183000  | -0.124962000 | -3.470728000 |
| C | -0.543790000 | -1.001093000 | -3.471178000 |
| C | -1.847840000 | -0.548698000 | -3.022481000 |
| C | 1.836285000  | -0.577488000 | -3.022244000 |

|   |              |              |              |
|---|--------------|--------------|--------------|
| C | 2.006953000  | -1.885986000 | -2.593420000 |
| C | 0.881607000  | -2.802564000 | -2.593872000 |
| C | -0.365070000 | -2.369643000 | -3.022244000 |
| C | 2.813047000  | -2.165579000 | -1.419287000 |
| C | 2.185634000  | -3.254915000 | -0.693761000 |
| C | 0.991961000  | -3.648498000 | -1.419648000 |
| C | -0.149223000 | -4.024455000 | -0.725707000 |
| C | -0.149223000 | -4.024455000 | 0.725707000  |
| C | 0.991961000  | -3.648498000 | 1.419648000  |
| C | 2.185634000  | -3.254915000 | 0.693761000  |
| C | 2.813047000  | -2.165579000 | 1.419287000  |
| C | 2.006953000  | -1.885986000 | 2.593420000  |
| C | 0.881607000  | -2.802564000 | 2.593872000  |
| C | -0.365070000 | -2.369643000 | 3.022245000  |
| C | -0.543790000 | -1.001093000 | 3.471178000  |
| C | 0.532183000  | -0.124962000 | 3.470728000  |
| C | 1.836285000  | -0.577488000 | 3.022244000  |
| C | 2.463478000  | 0.511665000  | 2.296332000  |
| C | -2.018508000 | 0.759615000  | 2.593190000  |
| C | -1.847840000 | -0.548698000 | 3.022481000  |
| C | 3.234417000  | 0.244394000  | 1.174171000  |
| C | 3.413037000  | -1.124388000 | 0.725722000  |
| C | -1.453301000 | -3.571827000 | 1.174181000  |
| C | -1.558801000 | -2.763193000 | 2.296551000  |
| C | -2.475292000 | -1.637720000 | 2.296822000  |
| C | 3.413038000  | -1.124388000 | -0.725722000 |
| C | -1.558801000 | -2.763193000 | -2.296551000 |
| C | -1.453301000 | -3.571827000 | -1.174181000 |
| C | -2.259223000 | -3.291932000 | 0.000000000  |
| C | -2.475292000 | -1.637720000 | -2.296822000 |
| C | -3.245399000 | -1.369816000 | -1.174214000 |
| C | -3.134972000 | -2.215663000 | 0.000000000  |
| C | 1.547053000  | 1.637316000  | -2.296458000 |
| C | 2.463478000  | 0.511665000  | -2.296332000 |
| C | 3.234417000  | 0.244394000  | -1.174171000 |
| C | -3.424545000 | -0.001047000 | -0.725842000 |
| C | 1.441369000  | 2.446811000  | -1.174537000 |
| C | -3.245399000 | -1.369816000 | 1.174214000  |
| C | -3.424545000 | -0.001047000 | 0.725842000  |
| C | -2.824379000 | 1.040001000  | 1.419145000  |
| C | 2.248173000  | 2.166758000  | 0.000000000  |
| C | 3.124228000  | 1.090474000  | 0.000000000  |
| C | 0.361307000  | 6.117319000  | -1.177000000 |
| C | 0.361307000  | 6.117319000  | 1.177000000  |
| C | -0.906805000 | 6.190197000  | 0.734570000  |
| C | -0.906805000 | 6.190197000  | -0.734570000 |
| C | 1.293444000  | 6.071103000  | 0.000000000  |
| H | 0.689494000  | 6.094226000  | -2.209066000 |

|   |              |             |              |
|---|--------------|-------------|--------------|
| H | -1.799037000 | 6.234795000 | -1.348812000 |
| H | -1.799037000 | 6.234795000 | 1.348812000  |
| H | 0.689494000  | 6.094225000 | 2.209066000  |
| H | 1.913866000  | 5.162427000 | 0.000000000  |
| H | 1.993230000  | 6.918385000 | 0.000000000  |

## PC

|   |              |              |              |
|---|--------------|--------------|--------------|
| C | 1.555196000  | 1.705230000  | 2.273634000  |
| C | 1.452918000  | 2.521842000  | 1.171093000  |
| C | 0.188803000  | 3.304815000  | 0.814760000  |
| C | -0.995151000 | 2.616441000  | 1.431452000  |
| C | -0.879964000 | 1.745362000  | 2.606119000  |
| C | 0.352876000  | 1.311864000  | 3.033315000  |
| C | -2.107877000 | 2.234759000  | 0.724918000  |
| C | -2.107877000 | 2.234759000  | -0.724918000 |
| C | -0.995151000 | 2.616441000  | -1.431452000 |
| C | 0.188803000  | 3.304815000  | -0.814760000 |
| C | -2.774174000 | 1.122420000  | -1.433847000 |
| C | -2.002737000 | 0.833817000  | -2.615332000 |
| C | -0.879964000 | 1.745362000  | -2.606119000 |
| C | 0.352876000  | 1.311864000  | -3.033315000 |
| C | 0.531683000  | -0.055597000 | -3.474992000 |
| C | -0.544614000 | -0.936609000 | -3.489966000 |
| C | -1.844322000 | -0.480435000 | -3.046503000 |
| C | 1.829088000  | -0.509782000 | -3.013436000 |
| C | 2.003671000  | -1.819694000 | -2.593085000 |
| C | 0.877824000  | -2.736284000 | -2.599223000 |
| C | -0.365316000 | -2.303940000 | -3.033170000 |
| C | 2.812257000  | -2.105489000 | -1.419822000 |
| C | 2.179458000  | -3.189426000 | -0.696287000 |
| C | 0.986857000  | -3.578840000 | -1.419985000 |
| C | -0.156712000 | -3.947879000 | -0.724243000 |
| C | -0.156712000 | -3.947879000 | 0.724243000  |
| C | 0.986857000  | -3.578840000 | 1.419985000  |
| C | 2.179458000  | -3.189426000 | 0.696287000  |
| C | 2.812257000  | -2.105489000 | 1.419822000  |
| C | 2.003671000  | -1.819694000 | 2.593085000  |
| C | 0.877824000  | -2.736284000 | 2.599223000  |
| C | -0.365316000 | -2.303940000 | 3.033170000  |
| C | -0.544614000 | -0.936609000 | 3.489966000  |
| C | 0.531683000  | -0.055597000 | 3.474992000  |
| C | 1.829088000  | -0.509782000 | 3.013436000  |
| C | 2.450742000  | 0.575229000  | 2.275264000  |
| C | -2.002737000 | 0.833817000  | 2.615332000  |
| C | -1.844322000 | -0.480435000 | 3.046503000  |
| C | 3.241451000  | 0.300388000  | 1.166703000  |
| C | 3.421085000  | -1.069303000 | 0.726123000  |
| C | -1.458680000 | -3.488621000 | 1.175773000  |

|   |              |              |              |
|---|--------------|--------------|--------------|
| C | -1.562048000 | -2.690000000 | 2.304208000  |
| C | -2.470094000 | -1.557228000 | 2.311884000  |
| C | 3.421085000  | -1.069303000 | -0.726123000 |
| C | -1.562048000 | -2.690000000 | -2.304208000 |
| C | -1.458680000 | -3.488621000 | -1.175772000 |
| C | -2.260709000 | -3.199865000 | 0.000000000  |
| C | -2.470094000 | -1.557228000 | -2.311884000 |
| C | -3.224093000 | -1.270063000 | -1.178243000 |
| C | -3.120968000 | -2.112401000 | 0.000000000  |
| C | 1.555196000  | 1.705230000  | -2.273634000 |
| C | 2.450742000  | 0.575229000  | -2.275264000 |
| C | 3.241451000  | 0.300388000  | -1.166703000 |
| C | -3.371186000 | 0.097359000  | -0.737017000 |
| C | 1.452918000  | 2.521842000  | -1.171093000 |
| C | -3.224093000 | -1.270063000 | 1.178243000  |
| C | -3.371186000 | 0.097359000  | 0.737017000  |
| C | -2.774174000 | 1.122420000  | 1.433847000  |
| C | 2.222538000  | 2.211430000  | 0.000000000  |
| C | 3.121274000  | 1.135608000  | 0.000000000  |
| C | 0.280849000  | 4.853054000  | -1.125202000 |
| C | 0.280849000  | 4.853054000  | 1.125202000  |
| C | -1.035766000 | 5.454721000  | 0.668145000  |
| C | -1.035766000 | 5.454721000  | -0.668145000 |
| C | 1.211857000  | 5.333022000  | 0.000000000  |
| H | 0.583213000  | 5.048657000  | -2.155087000 |
| H | -1.855436000 | 5.720275000  | -1.325271000 |
| H | -1.855436000 | 5.720275000  | 1.325271000  |
| H | 0.583213000  | 5.048657000  | 2.155087000  |
| H | 2.196550000  | 4.857967000  | 0.000000000  |
| H | 1.323748000  | 6.419173000  | 0.000000000  |

## [6.6] path

|    |              |              |             |
|----|--------------|--------------|-------------|
| TS |              |              |             |
| C  | -2.391177000 | 1.962693000  | 0.732004000 |
| C  | -1.283435000 | 2.427708000  | 1.415077000 |
| C  | -0.136869000 | 3.038321000  | 0.719331000 |
| C  | -3.482221000 | 0.018784000  | 0.000000000 |
| C  | -3.064810000 | 0.761178000  | 1.175221000 |
| C  | -2.617653000 | 0.079569000  | 2.301765000 |
| C  | 1.053459000  | 2.516403000  | 1.416745000 |
| C  | 2.193254000  | 2.143544000  | 0.734072000 |
| C  | -3.433273000 | -1.368152000 | 0.000000000 |
| C  | 0.637582000  | 1.768331000  | 2.578551000 |
| C  | 3.075196000  | -1.842242000 | 1.174837000 |
| C  | 2.621981000  | -1.167273000 | 2.299446000 |
| C  | 1.466900000  | -1.664513000 | 3.025877000 |

|   |              |              |              |
|---|--------------|--------------|--------------|
| C | 0.817098000  | -2.812839000 | 2.595173000  |
| C | 1.293093000  | -3.518235000 | 1.420050000  |
| C | 3.489895000  | -1.096809000 | 0.000000000  |
| C | 3.429685000  | 0.289542000  | 0.000000000  |
| C | 2.956295000  | 0.997312000  | 1.175805000  |
| C | 2.565576000  | 0.282214000  | 2.303834000  |
| C | 0.695439000  | -0.521025000 | 3.474684000  |
| C | -0.690315000 | -0.574765000 | 3.473983000  |
| C | -1.370474000 | -1.774875000 | 3.025355000  |
| C | -0.633455000 | -2.869473000 | 2.594936000  |
| C | -1.053293000 | -3.609765000 | 1.419843000  |
| C | 0.137564000  | -4.011487000 | 0.693799000  |
| C | -2.191441000 | -3.222725000 | 0.726198000  |
| C | -2.960792000 | -2.078398000 | 1.174707000  |
| C | -2.560858000 | -1.369782000 | 2.299027000  |
| C | 1.378029000  | 0.679575000  | 3.023307000  |
| C | -1.463619000 | 0.569306000  | 3.021425000  |
| C | 2.397181000  | -3.042830000 | 0.726141000  |
| C | -0.296007000 | 5.209210000  | 1.154817000  |
| C | 0.964901000  | 5.590570000  | 0.702394000  |
| C | -1.248804000 | 5.350493000  | 0.000000000  |
| H | -2.107010000 | 4.675223000  | 0.000000000  |
| H | -1.630137000 | 6.383419000  | 0.000000000  |
| H | 1.838204000  | 5.731345000  | 1.328286000  |
| H | -0.609168000 | 5.209086000  | 2.192987000  |
| C | -0.810400000 | 1.712404000  | 2.578717000  |
| C | -2.391177000 | 1.962693000  | -0.732004000 |
| C | -1.283435000 | 2.427708000  | -1.415077000 |
| C | -0.136869000 | 3.038321000  | -0.719331000 |
| C | -3.064810000 | 0.761178000  | -1.175221000 |
| C | -2.617653000 | 0.079569000  | -2.301765000 |
| C | 1.053459000  | 2.516403000  | -1.416745000 |
| C | 2.193254000  | 2.143544000  | -0.734072000 |
| C | 0.637582000  | 1.768331000  | -2.578551000 |
| C | 3.075196000  | -1.842242000 | -1.174837000 |
| C | 2.621981000  | -1.167273000 | -2.299446000 |
| C | 1.466900000  | -1.664513000 | -3.025877000 |
| C | 0.817098000  | -2.812839000 | -2.595173000 |
| C | 1.293093000  | -3.518235000 | -1.420050000 |
| C | 2.956295000  | 0.997312000  | -1.175805000 |
| C | 2.565576000  | 0.282214000  | -2.303834000 |
| C | 0.695439000  | -0.521025000 | -3.474684000 |
| C | -0.690315000 | -0.574765000 | -3.473983000 |
| C | -1.370474000 | -1.774875000 | -3.025355000 |
| C | -0.633455000 | -2.869473000 | -2.594936000 |
| C | -1.053293000 | -3.609765000 | -1.419843000 |
| C | 0.137564000  | -4.011487000 | -0.693799000 |
| C | -2.191441000 | -3.222725000 | -0.726198000 |

|   |              |              |              |
|---|--------------|--------------|--------------|
| C | -2.960792000 | -2.078398000 | -1.174707000 |
| C | -2.560858000 | -1.369782000 | -2.299027000 |
| C | 1.378029000  | 0.679575000  | -3.023307000 |
| C | -1.463619000 | 0.569306000  | -3.021425000 |
| C | 2.397181000  | -3.042830000 | -0.726141000 |
| C | -0.296007000 | 5.209210000  | -1.154817000 |
| C | 0.964901000  | 5.590570000  | -0.702394000 |
| H | 1.838204000  | 5.731345000  | -1.328286000 |
| H | -0.609168000 | 5.209086000  | -2.192987000 |
| C | -0.810400000 | 1.712404000  | -2.578717000 |

RC

|   |              |              |             |
|---|--------------|--------------|-------------|
| C | -2.395085000 | 1.967489000  | 0.726521000 |
| C | -1.285411000 | 2.431411000  | 1.418388000 |
| C | -0.129317000 | 2.919082000  | 0.692609000 |
| C | -3.494576000 | 0.025188000  | 0.000000000 |
| C | -3.074885000 | 0.767209000  | 1.175031000 |
| C | -2.619009000 | 0.090036000  | 2.298255000 |
| C | 1.061149000  | 2.519168000  | 1.418680000 |
| C | 2.201904000  | 2.142580000  | 0.727521000 |
| C | -3.439996000 | -1.361211000 | 0.000000000 |
| C | 0.641111000  | 1.782130000  | 2.593678000 |
| C | 3.076802000  | -1.838734000 | 1.174433000 |
| C | 2.622546000  | -1.162283000 | 2.297492000 |
| C | 1.466094000  | -1.655782000 | 3.023601000 |
| C | 0.815047000  | -2.803168000 | 2.594059000 |
| C | 1.290648000  | -3.510495000 | 1.419516000 |
| C | 3.496943000  | -1.096519000 | 0.000000000 |
| C | 3.445265000  | 0.289793000  | 0.000000000 |
| C | 2.970208000  | 0.997671000  | 1.175350000 |
| C | 2.568698000  | 0.287728000  | 2.299649000 |
| C | 0.696077000  | -0.511266000 | 3.473461000 |
| C | -0.690720000 | -0.564008000 | 3.473137000 |
| C | -1.371434000 | -1.763695000 | 3.023286000 |
| C | -0.635198000 | -2.858477000 | 2.593841000 |
| C | -1.055805000 | -3.599820000 | 1.419283000 |
| C | 0.134574000  | -4.002826000 | 0.693649000 |
| C | -2.193791000 | -3.214072000 | 0.725718000 |
| C | -2.963983000 | -2.068976000 | 1.174286000 |
| C | -2.562056000 | -1.359742000 | 2.297185000 |
| C | 1.378755000  | 0.689386000  | 3.025509000 |
| C | -1.462366000 | 0.581375000  | 3.024486000 |
| C | 2.395631000  | -3.038891000 | 0.725714000 |
| C | -0.326057000 | 5.833027000  | 1.175460000 |
| C | 0.944505000  | 5.902753000  | 0.732298000 |
| C | -1.260668000 | 5.818577000  | 0.000000000 |
| H | -1.934418000 | 4.950639000  | 0.000000000 |



|   |              |              |              |
|---|--------------|--------------|--------------|
| H | -1.907215000 | 6.707965000  | 0.000000000  |
| H | 1.836536000  | 5.935264000  | 1.347531000  |
| H | -0.653269000 | 5.811645000  | 2.208128000  |
| C | -0.810172000 | 1.727130000  | 2.594305000  |
| C | -2.395085000 | 1.967489000  | -0.726521000 |
| C | -1.285411000 | 2.431411000  | -1.418388000 |
| C | -0.129317000 | 2.919082000  | -0.692609000 |
| C | -3.074885000 | 0.767209000  | -1.175031000 |
| C | -2.619009000 | 0.090036000  | -2.298255000 |
| C | 1.061149000  | 2.519168000  | -1.418680000 |
| C | 2.201904000  | 2.142580000  | -0.727521000 |
| C | 0.641111000  | 1.782130000  | -2.593678000 |
| C | 3.076802000  | -1.838734000 | -1.174433000 |
| C | 2.622546000  | -1.162283000 | -2.297492000 |
| C | 1.466094000  | -1.655782000 | -3.023601000 |
| C | 0.815047000  | -2.803168000 | -2.594059000 |
| C | 1.290648000  | -3.510495000 | -1.419516000 |
| C | 2.970208000  | 0.997671000  | -1.175350000 |
| C | 2.568698000  | 0.287728000  | -2.299649000 |
| C | 0.696077000  | -0.511266000 | -3.473461000 |
| C | -0.690720000 | -0.564008000 | -3.473137000 |
| C | -1.371434000 | -1.763695000 | -3.023286000 |
| C | -0.635198000 | -2.858477000 | -2.593841000 |
| C | -1.055805000 | -3.599820000 | -1.419283000 |
| C | 0.134574000  | -4.002826000 | -0.693649000 |
| C | -2.193791000 | -3.214072000 | -0.725718000 |
| C | -2.963983000 | -2.068976000 | -1.174286000 |
| C | -2.562056000 | -1.359742000 | -2.297185000 |
| C | 1.378755000  | 0.689386000  | -3.025509000 |
| C | -1.462366000 | 0.581375000  | -3.024486000 |
| C | 2.395631000  | -3.038891000 | -0.725714000 |
| C | -0.326057000 | 5.833027000  | -1.175460000 |
| C | 0.944505000  | 5.902753000  | -0.732298000 |
| H | 1.836536000  | 5.935264000  | -1.347531000 |
| H | -0.653269000 | 5.811645000  | -2.208128000 |
| C | -0.810172000 | 1.727130000  | -2.594305000 |

## PC

|   |              |              |             |
|---|--------------|--------------|-------------|
| C | -2.387439000 | 2.013780000  | 0.740985000 |
| C | -1.301557000 | 2.489438000  | 1.430661000 |
| C | -0.161731000 | 3.284066000  | 0.800887000 |
| C | -3.470263000 | 0.068370000  | 0.000000000 |
| C | -3.056179000 | 0.810488000  | 1.175166000 |
| C | -2.620576000 | 0.127081000  | 2.306707000 |
| C | 1.036569000  | 2.591197000  | 1.435272000 |
| C | 2.157298000  | 2.210150000  | 0.741201000 |
| C | -3.429731000 | -1.318031000 | 0.000000000 |
| C | 0.622971000  | 1.825667000  | 2.578170000 |

|   |              |              |              |
|---|--------------|--------------|--------------|
| C | 3.069013000  | -1.772182000 | 1.175559000  |
| C | 2.615263000  | -1.100986000 | 2.302682000  |
| C | 1.463821000  | -1.604610000 | 3.029930000  |
| C | 0.818171000  | -2.755237000 | 2.597287000  |
| C | 1.296074000  | -3.455998000 | 1.420988000  |
| C | 3.477099000  | -1.023481000 | 0.000000000  |
| C | 3.399361000  | 0.361280000  | 0.000000000  |
| C | 2.923774000  | 1.066008000  | 1.175060000  |
| C | 2.548931000  | 0.347715000  | 2.307210000  |
| C | 0.687933000  | -0.464912000 | 3.479912000  |
| C | -0.697018000 | -0.523733000 | 3.479685000  |
| C | -1.373281000 | -1.725419000 | 3.030023000  |
| C | -0.632385000 | -2.817093000 | 2.597179000  |
| C | -1.049336000 | -3.555792000 | 1.420796000  |
| C | 0.142350000  | -3.952467000 | 0.693854000  |
| C | -2.188375000 | -3.169926000 | 0.726714000  |
| C | -2.959054000 | -2.028961000 | 1.175674000  |
| C | -2.563510000 | -1.321770000 | 2.302905000  |
| C | 1.365473000  | 0.738239000  | 3.027890000  |
| C | -1.473868000 | 0.617528000  | 3.026285000  |
| C | 2.397841000  | -2.974520000 | 0.726730000  |
| C | -0.257051000 | 4.832037000  | 1.121762000  |
| C | 1.051706000  | 5.446577000  | 0.668166000  |
| C | -1.200895000 | 5.291704000  | 0.000000000  |
| H | -2.166707000 | 4.775580000  | 0.000000000  |
| H | -1.352267000 | 6.373303000  | 0.000000000  |
| H | 1.868836000  | 5.716044000  | 1.327114000  |
| H | -0.559127000 | 5.020148000  | 2.153066000  |
| C | -0.825843000 | 1.763857000  | 2.576711000  |
| C | -2.387439000 | 2.013780000  | -0.740985000 |
| C | -1.301557000 | 2.489438000  | -1.430661000 |
| C | -0.161731000 | 3.284066000  | -0.800887000 |
| C | -3.056179000 | 0.810488000  | -1.175166000 |
| C | -2.620576000 | 0.127081000  | -2.306707000 |
| C | 1.036569000  | 2.591197000  | -1.435272000 |
| C | 2.157298000  | 2.210150000  | -0.741201000 |
| C | 0.622971000  | 1.825667000  | -2.578170000 |
| C | 3.069013000  | -1.772182000 | -1.175559000 |
| C | 2.615263000  | -1.100986000 | -2.302682000 |
| C | 1.463821000  | -1.604610000 | -3.029930000 |
| C | 0.818171000  | -2.755237000 | -2.597287000 |
| C | 1.296074000  | -3.455998000 | -1.420988000 |
| C | 2.923774000  | 1.066008000  | -1.175060000 |
| C | 2.548931000  | 0.347715000  | -2.307210000 |
| C | 0.687933000  | -0.464912000 | -3.479912000 |
| C | -0.697018000 | -0.523733000 | -3.479685000 |
| C | -1.373281000 | -1.725419000 | -3.030023000 |
| C | -0.632385000 | -2.817093000 | -2.597179000 |

|   |              |              |              |
|---|--------------|--------------|--------------|
| C | -1.049336000 | -3.555792000 | -1.420796000 |
| C | 0.142350000  | -3.952467000 | -0.693854000 |
| C | -2.188375000 | -3.169926000 | -0.726714000 |
| C | -2.959054000 | -2.028961000 | -1.175674000 |
| C | -2.563510000 | -1.321770000 | -2.302905000 |
| C | 1.365473000  | 0.738239000  | -3.027890000 |
| C | -1.473868000 | 0.617528000  | -3.026285000 |
| C | 2.397841000  | -2.974520000 | -0.726730000 |
| C | -0.257051000 | 4.832037000  | -1.121762000 |
| C | 1.051706000  | 5.446577000  | -0.668166000 |
| H | 1.868836000  | 5.716044000  | -1.327114000 |
| H | -0.559127000 | 5.020148000  | -2.153066000 |
| C | -0.825843000 | 1.763857000  | -2.576711000 |
